# Supplementary material for: Tumor budding of cervical squamous cell carcinoma: epithelial-mesenchymal transition-like cancer stem cells?
Source: PeerJ. 2022 Jul 15;10:e13745. doi: 10.7717/peerj.13745 (PMC9291004; doi:10.7717/peerj.13745)
Supplement: Supplemental Information 1 [file peerj-10-13745-s001.xlsx]

## Sheet: Sheet1
		tumor budding(Negative/Low,1;High,2)(no/weak reaction,1;moderate/intense reaction,2)							mian tumor body(Negative/Low,1;High,2)(no/weak reaction,1;moderate/intense reaction,2)
NO.	Location	SOX2	CD44	ALDH1A1	Vimentin	E-Cadherin	β-Catenin	Ki67	SOX2	CD44	ALDH1A1	Vimentin	E-Cadherin	β-Catenin	Ki67
1	1-1-A3	2	1	1	1	1	membranous expression	1	1	1	1	1	2	membranous expression	2
2	A4	2	1	2	1	2	membranous expression	1	1	1	1	1	2	membranous expression	2
3	A6	2	1	1	2	1	cytoplasmic expression	1	1	1	1	1	2	membranous expression	2
5	A8	1	1	2	1	1	cytoplasmic expression	1	1	1	1	1	2	cytoplasmic expression	2
6	A9	1	1	2	1	1	cytoplasmic expression	1	1	2	1	1	2	membranous expression	2
8	A11	2	1	2	2	1	cytoplasmic expression	1	2	2	1	2	2	membranous expression	2
9	B2	1	1	1	1	1	cytoplasmic expression	1	1	1	1	1	1	membranous expression	2
10	B3	2	2	1	1	1	cytoplasmic expression	1	1	1	1	1	2	membranous expression	2
11	B4	1	2	1	1	1	membranous expression	1	1	2	1	1	2	membranous expression	2
12	B5	2	2	2	1	1	cytoplasmic expression	1	1	2	1	1	2	membranous expression	2
13	B6	2	2	2	1	1	cytoplasmic expression	1	1	2	1	1	2	membranous expression	2
14	B7	1	1	1	1	1	cytoplasmic expression	1	1	2	1	1	2	membranous expression	2
15	B8	1	1	1	1	1	cytoplasmic expression	1	1	1	2	1	2	membranous expression	2
16	B9	2	1	2	1	1	cytoplasmic expression	2	2	1	1	1	2	membranous expression	2
17	B10	1	1	1	1	1	cytoplasmic expression	1	1	2	1	1	2	membranous expression	2
18	B11	2	1	2	1	1	cytoplasmic expression	2	1	1	1	2	2	membranous expression	2
19	C2	2	1	1	1	1	membranous expression	1	1	1	1	1	1	membranous expression	2
20	C3	2	1	1	1	2	membranous expression	2	1	1	2	1	2	membranous expression	2
21	C4	2	1	2	2	1	membranous expression	1	1	1	1	1	2	membranous expression	2
23	C6	2	1	2	1	1	cytoplasmic expression	1	1	1	1	1	1	membranous expression	2
24	C7	1	1	1	1	1	cytoplasmic expression	1	2	1	1	1	2	membranous expression	2
25	C8	1	1	1	1	1	cytoplasmic expression	1	1	2	2	1	2	membranous expression	2
26	C9	1	1	1	1	2	cytoplasmic expression	1	1	1	1	1	2	membranous expression	2
27	C10	2	1	2	1	2	membranous expression	1	1	2	2	1	2	membranous expression	2
28	C11	2	1	2	1	1	cytoplasmic expression	1	1	1	1	1	2	membranous expression	2
29	D2	1	1	1	1	1	membranous expression	1	1	1	1	1	2	membranous expression	2
31	D4	2	1	1	1	1	cytoplasmic expression	1	1	1	1	1	1	membranous expression	2
32	D5	2	1	2	2	1	cytoplasmic expression	1	1	1	1	1	1	cytoplasmic expression	2
34	D7	2	1	1	1	1	cytoplasmic expression	1	1	2	1	1	2	cytoplasmic expression	2
35	D8	2	1	2	1	1	cytoplasmic expression	1	1	1	1	1	2	membranous expression	2
36	D9	1	2	1	2	2	cytoplasmic expression	1	1	1	1	1	2	membranous expression	2
37	D10	2	1	2	2	2	cytoplasmic expression	2	1	1	1	1	2	membranous expression	2
38	D11	1	1	2	1	1	cytoplasmic expression	1	1	1	2	1	2	membranous expression	2
39	E2	1	2	1	2	1	membranous expression	1	1	2	2	1	2	membranous expression	2
40	E3	2	1	2	1	1	membranous expression	2	2	2	1	1	2	cytoplasmic expression	2
41	E4	2	2	2	1	1	membranous expression	1	1	1	1	1	2	membranous expression	2
42	E5	1	1	1	1	2	cytoplasmic expression	1	1	2	1	1	2	membranous expression	2
43	E6	2	1	2	1	2	cytoplasmic expression	1	1	1	2	1	2	membranous expression	2
44	E7	2	1	2	1	1	cytoplasmic expression	1	1	2	1	1	2	membranous expression	2
45	E8	2	1	2	1	2	cytoplasmic expression	2	1	2	1	1	2	membranous expression	2
46	E9	1	1	1	1	2	cytoplasmic expression	1	1	2	2	1	2	membranous expression	2
48	E11	1	1	2	1	1	cytoplasmic expression	1	1	2	1	1	2	membranous expression	2
49	F2	1	1	1	1	1	cytoplasmic expression	2	1	2	1	1	2	membranous expression	2
50	F3	1	1	2	2	1	membranous expression	1	1	1	1	1	2	membranous expression	2
51	F4	1	1	1	1	2	cytoplasmic expression	2	1	2	1	1	2	membranous expression	2
52	F5	1	1	2	1	1	cytoplasmic expression	2	1	2	1	1	2	membranous expression	2
53	F6	1	1	1	2	1	cytoplasmic expression	1	1	2	1	1	2	membranous expression	2
54	F7	2	1	1	1	1	membranous expression	1	1	1	1	1	2	membranous expression	2
55	F8	2	1	2	1	1	membranous expression	1	1	2	2	1	2	membranous expression	2
57	F10	2	2	2	2	1	cytoplasmic expression	2	2	2	2	1	2	membranous expression	2
58	F11	2	1	2	1	1	membranous expression	2	2	1	1	1	2	membranous expression	2
59	2-1-A3	2	1	2	1	1	cytoplasmic expression	2	1	2	2	1	1	cytoplasmic expression	1
60	A4	1	1	2	1	1	cytoplasmic expression	1	1	1	1	1	2	membranous expression	2
61	A5	2	1	2	1	1	cytoplasmic expression	1	1	1	1	1	2	membranous expression	2
62	A7	1	2	1	2	1	cytoplasmic expression	1	1	2	1	1	2	membranous expression	2
64	A9	2	2	2	1	2	cytoplasmic expression	1	1	2	1	1	2	membranous expression	2
65	A10	1	2	1	1	2	membranous expression	1	1	1	1	1	2	membranous expression	2
66	B2	1	1	1	2	1	membranous expression	2	1	1	1	1	2	membranous expression	2
67	B3	2	1	2	1	2	membranous expression	1	1	1	1	1	2	membranous expression	1
68	B4	2	2	1	1	1	membranous expression	1	1	2	2	1	2	membranous expression	2
69	B5	2	1	1	1	1	cytoplasmic expression	1	1	2	2	1	2	membranous expression	2
70	B6	2	1	1	1	1	cytoplasmic expression	2	1	1	1	1	2	membranous expression	2
71	B7	1	1	1	1	1	membranous expression	1	1	1	1	1	2	membranous expression	1
72	B8	2	1	1	1	2	cytoplasmic expression	1	1	2	1	1	2	membranous expression	2
73	B9	1	1	1	1	1	cytoplasmic expression	1	1	1	2	1	2	membranous expression	2
74	B10	1	1	2	1	1	membranous expression	1	1	1	2	1	2	membranous expression	2
75	B11	1	1	2	1	1	cytoplasmic expression	1	1	1	2	1	2	membranous expression	1
76	C2	2	1	2	1	1	cytoplasmic expression	2	1	1	2	1	2	membranous expression	2
77	C3	1	1	1	2	1	membranous expression	1	1	2	1	1	2	membranous expression	2
78	C4	1	1	2	1	1	cytoplasmic expression	1	1	1	1	1	2	cytoplasmic expression	1
79	C5	2	1	1	2	1	cytoplasmic expression	1	2	2	1	1	2	membranous expression	2
80	C6	2	1	2	1	1	cytoplasmic expression	1	2	2	2	1	2	membranous expression	2
81	C7	1	1	1	1	1	cytoplasmic expression	1	1	2	1	1	2	membranous expression	2
82	C8	1	1	1	1	1	membranous expression	1	1	1	1	1	2	membranous expression	2
83	C9	2	1	1	2	2	membranous expression	1	1	2	1	1	2	membranous expression	2
84	C10	1	1	2	2	1	cytoplasmic expression	1	1	2	1	1	2	membranous expression	2
85	C11	2	1	2	1	1	cytoplasmic expression	1	1	1	1	1	2	membranous expression	2
86	D2	2	1	2	2	2	membranous expression	1	1	1	1	1	2	membranous expression	2
87	D3	1	1	2	2	1	membranous expression	1	1	1	1	1	1	membranous expression	2
88	D4	1	1	1	1	1	cytoplasmic expression	1	1	2	1	1	2	membranous expression	2
89	D5	1	1	2	1	1	cytoplasmic expression	1	1	1	1	1	2	membranous expression	2
90	D6	2	1	2	1	1	membranous expression	1	1	2	1	1	2	membranous expression	2
91	D7	1	1	1	1	2	membranous expression	1	1	1	1	1	2	membranous expression	2
92	D8	1	1	1	1	2	membranous expression	1	1	2	1	1	2	membranous expression	2
93	D9	1	1	2	1	1	cytoplasmic expression	1	1	1	1	1	1	membranous expression	2
94	D10	1	1	1	1	2	cytoplasmic expression	1	1	2	1	2	2	membranous expression	2
95	D11	2	1	2	2	1	cytoplasmic expression	1	1	1	1	1	2	cytoplasmic expression	2

## Sheet: SOX2
Group	Immunoreactivity	Frequency
1	0	20
1	1	17
1	2	39
2	0	47
2	1	28
2	2	8

## Sheet: CD133
Group	Immunoreactivity	Frequency
1	0	7
1	1	1
1	2	73
2	0	8
2	1	13
2	2	64

## Sheet: CD44
Group	Immunoreactivity	Frequency
1	0	61
1	1	2
1	2	10
2	0	30
2	1	17
2	2	39

## Sheet: ck
Group	Immunoreactivity	Frequency
1	0	0
1	1	18
1	2	68
2	0	0
2	1	0
2	2	87

## Sheet: β-catenin
Group	Immunoreactivity	Frequency
1	1	29
1	2	58
2	1	80
2	2	7
